# Supplementary material for: Cerulenin inhibits unsaturated fatty acids synthesis in Bacillus subtilis by modifying the input signal of DesK thermosensor
Source: PubMed Central journal article supplement (PMC3996569; doi:10.1002/mbo3.154), 2014-02-14

**A**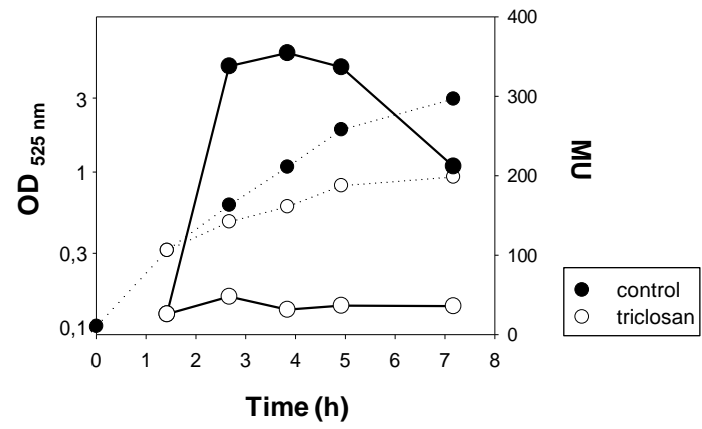**B**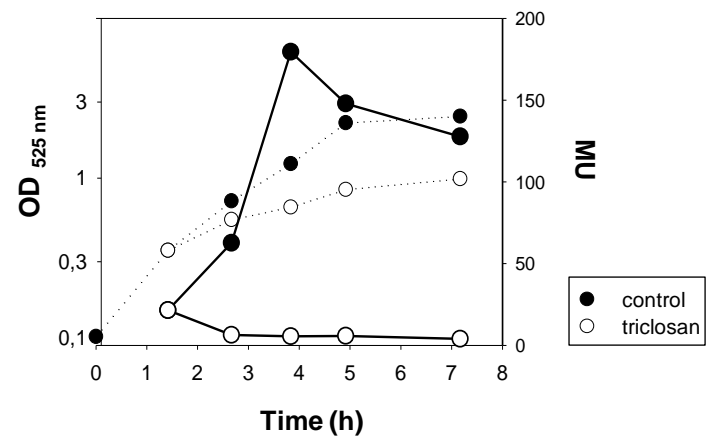

Supplement: mbo30003-0213-sd2.pdf [file mbo30003-0213-sd2.pdf]
